# Supplementary material for: Molecular profiling of lipid droplets inside HuH7 cells with Raman micro-spectroscopy
Source: PubMed Central journal article supplement (PMC7351753; doi:10.1038/s42003-020-1100-4), 2020-07-10
Supplement: 42003_2020_1100_MOESM1_ESM.pdf [file 42003_2020_1100_MOESM1_ESM.pdf]

## Supplementary Figures

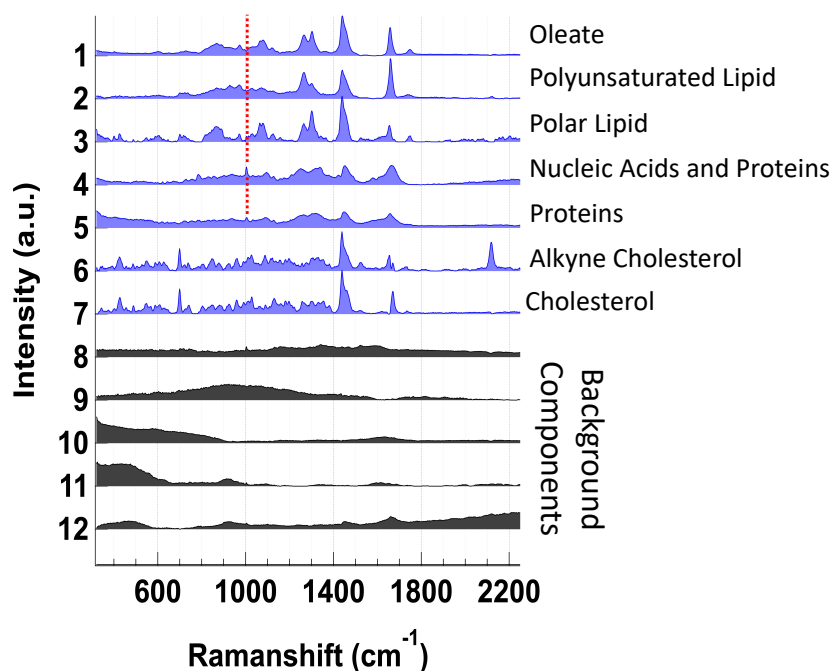

**Supplementary Figure 1.** Complete list of MCR spectral components and background components (gray). The red line indicates absence of protein signature band at 1003  $\text{cm}^{-1}$  in the lipid spectra suggesting a complete separation of these spectral components (See “spectral assignments” in Methods).

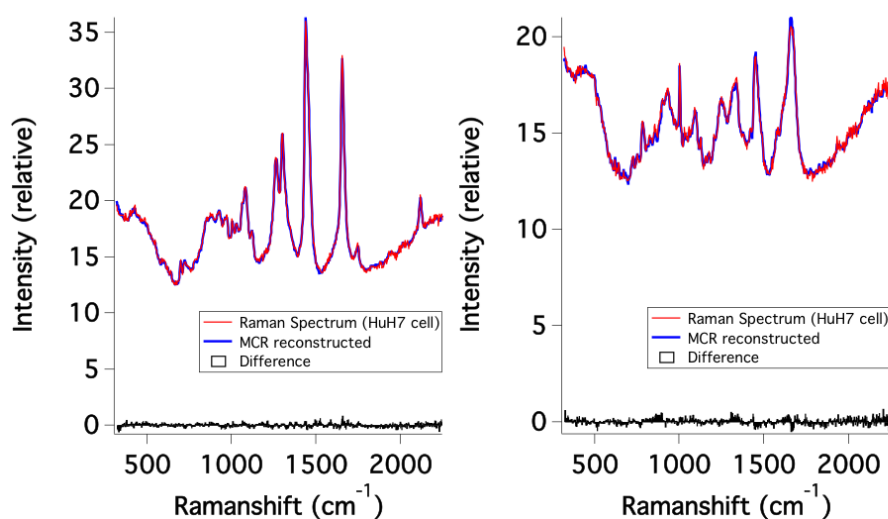

**Supplementary Figure 2.** Comparison of the signal and the residual in the MCR-ALS analysis.

## OL-Feed

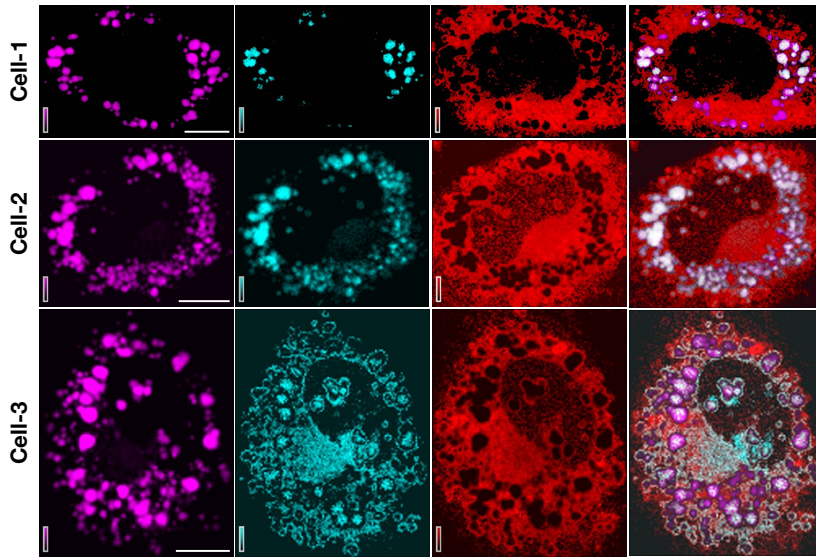

## CH-Feed

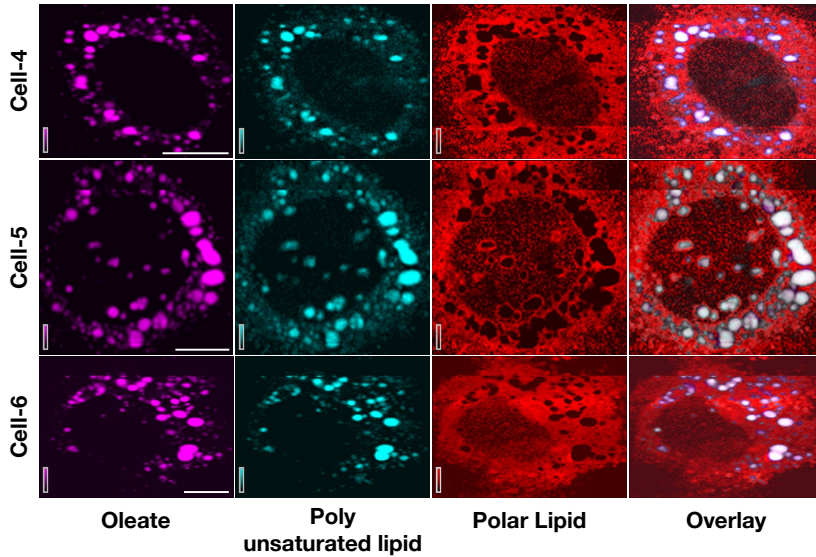

**Supplementary Figure 3.** Distribution of lipids in the HuH7 cells. Scale bar 10  $\mu$ m.

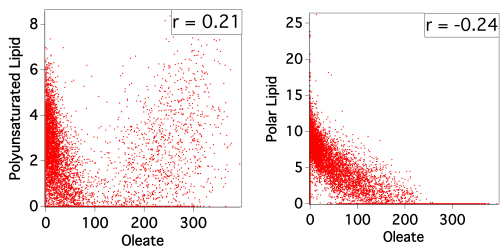

**Supplementary Figure 4.** Pearson's's correlation between lipid images for cell-3 (Cultured under OL-feed condition).

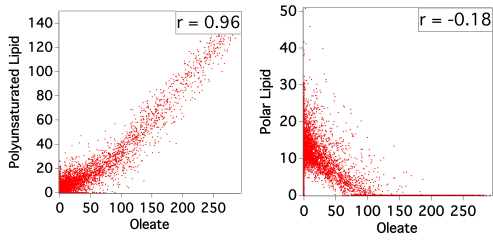

**Supplementary Figure 5.** Pearson's correlation between lipid images for cell-6 (Cultured under CH-feed condition).

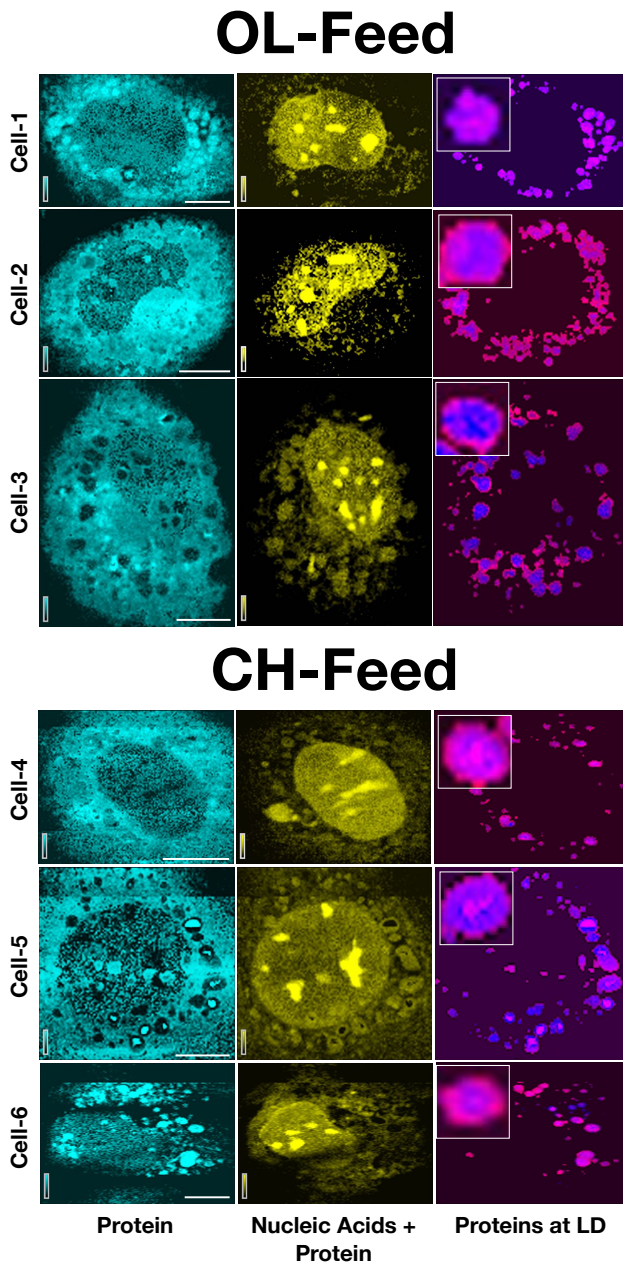

**Supplementary Figure 6.** Distribution of proteins and nucleic acids in the HuH7 cells. Scale bar 10  $\mu\text{m}$ .

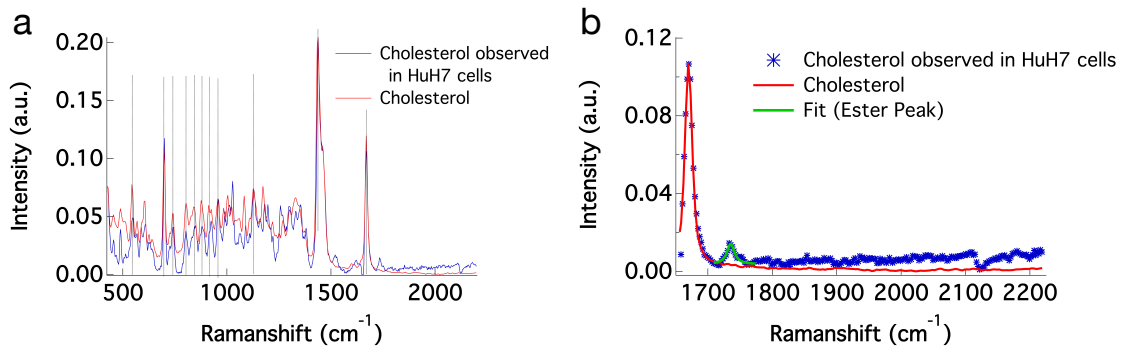

**Supplementary Figure 7.** a) comparison of Raman spectra of standard cholesterol and cholesterol observed in the cells. b) zoomed plot.

### OL-Feed

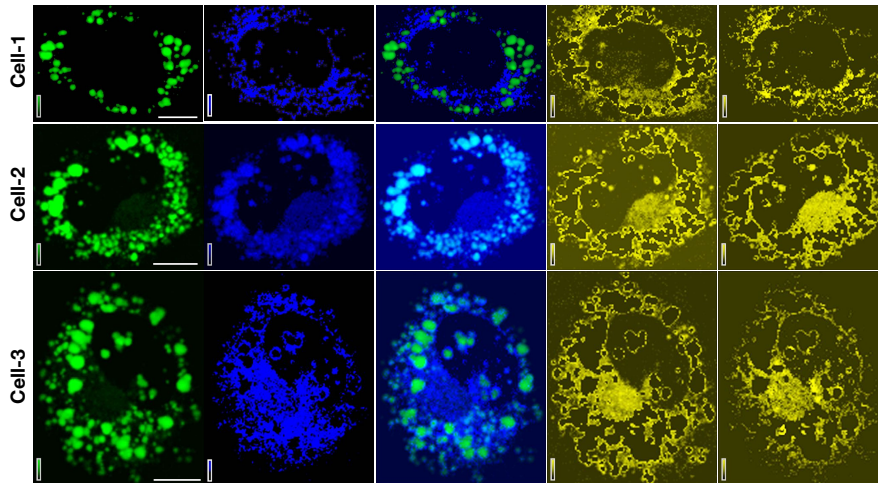

### CH-Feed

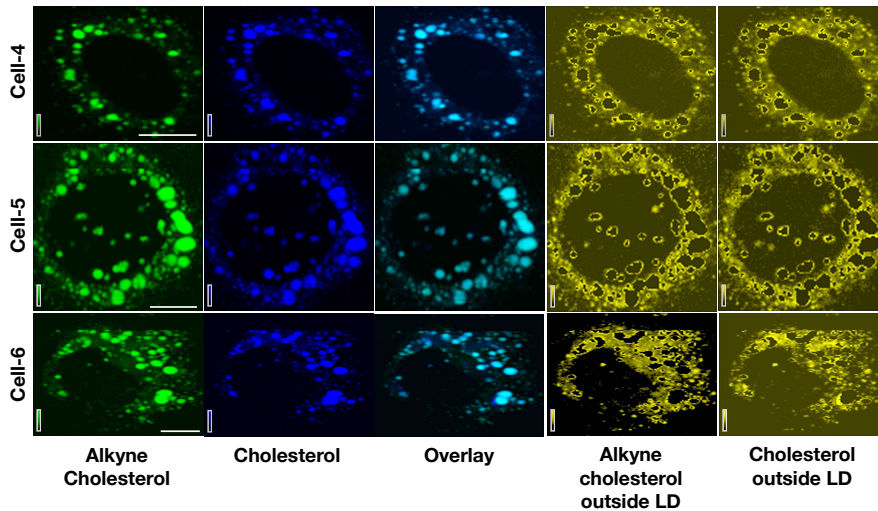

**Supplementary Figure 8.** Distribution of sterols in the HuH7 cells. Scale bar 10  $\mu\text{m}$ .

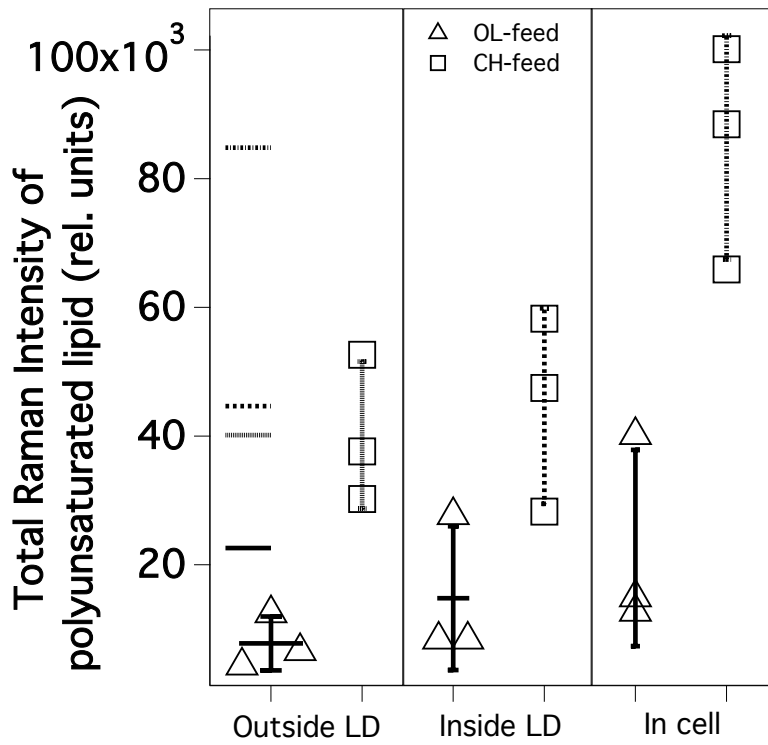

**Supplementary Figure 9.** Total Raman intensity of polyunsaturated lipid at different locations (e.g. outside LDs) of the cells.

## Supplementary Tables

**Supplementary Table 1.** Pearson's correlates coefficients (PC) for different pairs of Raman images.

| Correlation Pair                                         | Pearson's Correlation Coefficient for cells |       |       |       |       |       |
|----------------------------------------------------------|---------------------------------------------|-------|-------|-------|-------|-------|
|                                                          | 1                                           | 2     | 3     | 4     | 5     | 6     |
| <b>Lipid 1 &amp; 2</b>                                   | 0.78                                        | 0.97  | 0.21  | 0.93  | 0.96  | 0.96  |
| <b>Lipid 2 &amp; 3</b>                                   | -0.12                                       | -0.28 | 0.42  | -0.17 | -0.18 | -0.13 |
| <b>Lipid 1 &amp; 3</b>                                   | -0.25                                       | -0.35 | -0.24 | -0.29 | -0.37 | -0.18 |
| <b>Alkyne Cholesterol &amp; lipid 1</b>                  | 0.99                                        | 0.99  | 0.99  | 0.99  | 0.99  | 0.98  |
| <b>Cholesterol &amp; alkyne cholesterol (Outside LD)</b> | 0.63                                        | 0.79  | 0.61  | 0.96  | 0.92  | 0.83  |
| <b>Cholesterol &amp; alkyne cholesterol (Inside LD)</b>  | 0.11                                        | 0.95  | 0.49  | 0.99  | 0.99  | 0.99  |
